# Supplementary material
Source: PubMed Central journal article supplement (PMC3173026)
Supplement: supp_94.4.1088_supplTablesMethodsRefs.pdf [file supp_94.4.1088_supplTablesMethodsRefs.pdf]

## Online Supplemental Material

**Online Supplemental Table 1.** Exclusion criteria and number of participants who were excluded due to each reason in the three cohorts.

| Exclusion reason                                                                           | HPFS                | NHS I                | NHS II               |
|--------------------------------------------------------------------------------------------|---------------------|----------------------|----------------------|
| Original sample size for the cohort                                                        | <b>51529 (1986)</b> | <b>121700 (1976)</b> | <b>116671 (1989)</b> |
| Diet information not available *                                                           | 3247                | 29293                | 21191                |
| Missing data for red meat or its types                                                     | 3081                | 2967                 | 0                    |
| Baseline diabetes                                                                          | 1636                | 2434                 | 4234                 |
| Diagnosis date of diabetes during the following up not available, or disease not confirmed | 1524                | 2181                 | 553                  |
| Baseline comorbidities (coronary heart disease, stroke, and cancer)                        | 4958                | 5265                 | 3189                 |
| Total number of participants left for the current analysis                                 | <b>37083</b>        | <b>79570</b>         | <b>87504</b>         |

HPFS, Health Professionals Follow-up Study; NHS, Nurses' Health Study.

\*Not returning diet questionnaire (including participants died before the baseline of the current analysis, 1986 for HPFS, 1980 for NHS I, and 1991 for NHS II), or leaving too many blanks on the diet questionnaire, or unusual total energy intake levels (i.e., daily energy intake <800 or >4200 kcal/d for men, and <500 or >3500 kcal/d for women).

## **Online Supplemental Methods for Meta-analysis**

### **Literature search**

We further conducted an updated meta-analysis incorporating our new results from the three cohorts together with previous publications. The recent two meta-analysis searched literature up to December 2008 (1) or March 2009 (2). Thus, we conducted additional literature search on MEDLINE and EMBASE from March 2009 to April 2011. We searched for all prospective studies that provided effect estimates for potential associations of unprocessed or processed red meat consumption and incidence of T2DM in adults. The two search terms included *meat, meat products, pork, beef, lamb, ham, bacon, sausage, ham, pastrami, salami, deli, animal food*, and *type 2 diabetes*, using MeSH term, key words, title and abstract where appropriate. The detailed search strategy is shown as follows. Our criteria for including studies in our meta-analysis were: prospective cohort study, type 2 diabetes as the endpoint, description of the red meat assessment, presentation of relative risk with a measure of variability, and description of adjustment for potential confounders.

### **MEDLINE search query**

#1

```
"Meat"[Mesh] OR "Meat Products"[Mesh] OR "Meat*"[tiab] OR "pork"[tiab] OR  
"beef"[tiab] OR "lamb"[tiab] or "ham"[tiab] OR "bacon" OR "sausage"[tiab] OR  
"pastrami"[tiab] OR "salami" OR "deli" OR "animal food*"[tiab]
```

#2

"Diabetes Mellitus"[Mesh] OR "Diabetes Mellitus, Type 2"[Mesh] OR "diabetes\*"[tiab]  
OR "diabetic\*"[tiab]

#3

#1 AND #2 AND Limits: Publication Date from 2009/03/01 to 2011/04/01

### **EMBASE search query**

#1

'meat'/exp OR 'meat':ab OR 'meats':ab OR 'pork':ab OR 'beef':ab OR 'lamb':ab OR  
'ham':ab OR 'bacon':ab OR 'sausage':ab OR 'pastrami':ab OR 'salami':ab OR 'deli':ab OR  
'animal food':ab AND [embase]/lim AND [1-3-2009]/sd NOT [4-1-2011]/sd

#2

'diabetes mellitus'/exp OR 'diabetes':ab OR 'diabetic':ab AND [embase]/lim AND [3-1-  
2009]/sd NOT [4-1-2011]/sd

#3

#1 AND #2

The literature search resulted in 164 citations from MEDLINE, and 206 citations from EMBASE. After combining the two datasets, 300 citations were left for evaluation, of

which 2 citations met the inclusion criteria and were included in the meta-analysis in addition to the citations in the two previous meta-analyses.

## Methods for the meta-analysis

Most of the previous studies reported results in quartiles or quintiles, to obtain the relative risk estimate for 100 grams/d unprocessed red meat and 50 grams of processed red meat, we used the method described by Orsini et al. (3) for the dose–response analysis and computed study-specific slopes across categories of red meat intake using variance-weighted least squares regression. The median or mean level of meat consumption in each category of intake was assigned to the corresponding relative risk for each study. For studies that reported meat consumption by ranges of intake we estimated the mean/median intake in each category by calculating the average of the upper and lower boundaries. When the highest category was open-ended, we assumed the open-ended interval length to be the same as the adjacent interval. When the lowest category was open-ended we set the lower boundary to zero. The relative risks were used as the common measure of association across studies and the hazard ratios and incidence density ratios were considered equivalent to relative risks. The relative risks were pooled using the DerSimonian and Laird random-effects model (4), given that significant heterogeneity was found. Forest plots were produced to visually assess the relative risks and corresponding 95% confidence intervals across studies. Heterogeneity of the relative risks across studies was evaluated by the Cochran Q test and the  $I^2$  statistic (5, 6). The Cochran Q test depends on the number of studies and has limited sensitivity, and the  $I^2$  represents the percentage of total variation across studies that is due to between-study heterogeneity rather than chance.  $I^2$  values of approximately 25%, 50% and 75% are considered to indicate low, moderate and high heterogeneity, respectively. The possibility of publication bias was evaluated using the Begg test and visual inspection of a funnel

plot (7, 8). The Duval and Tweedie nonparametric “trim and fill” procedure was used to further assess the possible effect of publication bias in our meta-analysis (9).

**Online Supplemental Table 2.** Hazard ratio (95% CI) of type 2 diabetes risk according to red meat intake (serving · 1000 kcal<sup>-1</sup> · d<sup>-1</sup>) in the HPFS, NHS I, and NHS II.

|                                 | Frequency of consumption (quintiles) |                   |                   |                   |                   | P for trend | HR for 1 serving·1000kcal <sup>-1</sup> ·d <sup>-1</sup> |
|---------------------------------|--------------------------------------|-------------------|-------------------|-------------------|-------------------|-------------|----------------------------------------------------------|
|                                 | Q1                                   | Q2                | Q3                | Q4                | Q5                |             |                                                          |
| <b>HPFS</b>                     |                                      |                   |                   |                   |                   |             |                                                          |
| Unprocessed red meat            |                                      |                   |                   |                   |                   |             |                                                          |
| Cases/person-years              | 359/130004                           | 409/130529        | 488/130642        | 572/130622        | 604/130535        |             |                                                          |
| Age-adjusted model              | 1.00                                 | 1.15 (1.00, 1.33) | 1.38 (1.21, 1.59) | 1.62 (1.42, 1.85) | 1.73 (1.52, 1.98) | <0.001      | 2.12 (1.83, 2.46)                                        |
| Multivariate model <sup>a</sup> | 1.00                                 | 1.00 (0.87, 1.16) | 1.09 (0.95, 1.26) | 1.22 (1.06, 1.40) | 1.15 (1.00, 1.33) | <0.001      | 1.28 (1.08, 1.52)                                        |
| Processed red meat              |                                      |                   |                   |                   |                   |             |                                                          |
| Cases/person-years              | 306/130700                           | 413/130488        | 479/130620        | 577/130502        | 657/130023        |             |                                                          |
| Age-adjusted model              | 1.00                                 | 1.36 (1.17, 1.58) | 1.59 (1.38, 1.84) | 1.94 (1.69, 2.23) | 2.16 (1.88, 2.47) | <0.001      | 2.77 (2.32, 3.30)                                        |
| Multivariate model <sup>a</sup> | 1.00                                 | 1.13 (0.98, 1.32) | 1.23 (1.06, 1.43) | 1.42 (1.23, 1.64) | 1.50 (1.29, 1.73) | <0.001      | 1.85 (1.49, 2.29)                                        |
| Total red meat                  |                                      |                   |                   |                   |                   |             |                                                          |
| Cases/person-years              | 328/130313                           | 380/130609        | 487/130618        | 564/130460        | 673/130333        |             |                                                          |
| Age-adjusted model              | 1.00                                 | 1.18 (1.01, 1.36) | 1.51 (1.31, 1.74) | 1.76 (1.53, 2.01) | 2.10 (1.84, 2.40) | <0.001      | 1.97 (1.78, 2.18)                                        |
| Multivariate model <sup>a</sup> | 1.00                                 | 1.00 (0.86, 1.16) | 1.20 (1.04, 1.39) | 1.29 (1.11, 1.49) | 1.39 (1.20, 1.61) | <0.001      | 1.38 (1.22, 1.57)                                        |

---

**NHS I**

---

## Unprocessed red meat

|                                 |             |                   |                   |                   |                   |        |                   |
|---------------------------------|-------------|-------------------|-------------------|-------------------|-------------------|--------|-------------------|
| Cases/person-years              | 1359/402023 | 1520/403026       | 1673/403421       | 1813/403209       | 1888/402493       |        |                   |
| Age-adjusted model              | 1.00        | 1.14 (1.06, 1.26) | 1.26 (1.17, 1.35) | 1.36 (1.27, 1.46) | 1.42 (1.32, 1.52) | <0.001 | 1.39 (1.30, 1.49) |
| Multivariate model <sup>a</sup> | 1.00        | 1.00 (0.92, 1.07) | 1.06 (0.98, 1.14) | 1.09 (1.01, 1.17) | 1.12 (1.04, 1.21) | <0.001 | 1.14 (1.05, 1.24) |

## Processed red meat

|                                 |             |                   |                   |                   |                   |        |                   |
|---------------------------------|-------------|-------------------|-------------------|-------------------|-------------------|--------|-------------------|
| Cases/person-years              | 1157/402791 | 1478/402718       | 1694/403050       | 1835/403190       | 2089/402423       |        |                   |
| Age-adjusted model              | 1.00        | 1.31 (1.22, 1.42) | 1.53 (1.42, 1.64) | 1.67 (1.55, 1.80) | 1.90 (1.77, 2.04) | <0.001 | 2.57 (2.30, 2.86) |
| Multivariate model <sup>a</sup> | 1.00        | 1.11 (1.02, 1.19) | 1.22 (1.13, 1.32) | 1.22 (1.13, 1.32) | 1.30 (1.21, 1.40) | <0.001 | 1.52 (1.33, 1.73) |

## Total red meat

|                                 |             |                   |                   |                   |                   |        |                   |
|---------------------------------|-------------|-------------------|-------------------|-------------------|-------------------|--------|-------------------|
| Cases/person-years              | 1227/402436 | 1456/402973       | 1732/403118       | 1823/403301       | 2015/402344       |        |                   |
| Age-adjusted model              | 1.00        | 1.21 (1.12, 1.31) | 1.45 (1.35, 1.56) | 1.53 (1.43, 1.65) | 1.70 (1.58, 1.82) | <0.001 | 1.49 (1.41, 1.58) |
| Multivariate model <sup>a</sup> | 1.00        | 1.04 (0.96, 1.12) | 1.16 (1.08, 1.25) | 1.18 (1.10, 1.27) | 1.25 (1.16, 1.35) | <0.001 | 1.20 (1.12, 1.28) |

---

**NHS II**

---

## Unprocessed red meat

|                                 |            |                   |                   |                   |                   |        |                   |
|---------------------------------|------------|-------------------|-------------------|-------------------|-------------------|--------|-------------------|
| Cases/person-years              | 361/271079 | 495/272534        | 587/273548        | 732/274336        | 893/274678        |        |                   |
| Age-adjusted model              | 1.00       | 1.39 (1.21, 1.59) | 1.63 (1.43, 1.85) | 2.00 (1.76, 2.27) | 2.40 (2.12, 2.71) | <0.001 | 2.68 (2.39, 2.99) |
| Multivariate model <sup>a</sup> | 1.00       | 1.10 (0.96, 1.26) | 1.11 (0.97, 1.27) | 1.21 (1.06, 1.38) | 1.26 (1.11, 1.44) | <0.001 | 1.36 (1.17, 1.58) |

---



|                                   |            |                   |                   |                   |                   |        |                   |
|-----------------------------------|------------|-------------------|-------------------|-------------------|-------------------|--------|-------------------|
| <b>Processed red meat</b>         |            |                   |                   |                   |                   |        |                   |
| Cases/person-years                | 405/271903 | 459/272498        | 597/273347        | 691/273829        | 916/274599        |        |                   |
| Age-adjusted model                | 1.00       | 1.18 (1.03, 1.35) | 1.56 (1.38, 1.77) | 1.82 (1.61, 2.05) | 2.42 (2.15, 2.72) | <0.001 | 4.58 (4.00, 5.24) |
| Multivariate model <sup>a</sup>   | 1.00       | 0.84 (0.73, 0.96) | 1.02 (0.90, 1.16) | 1.04 (0.91, 1.18) | 1.11 (0.98, 1.26) | <0.001 | 1.91 (1.50, 2.43) |
| <b>Total red meat</b>             |            |                   |                   |                   |                   |        |                   |
| Cases/person-years                | 333/271598 | 449/272454        | 598/273505        | 679/274158        | 1011/274460       |        |                   |
| Age-adjusted model                | 1.00       | 1.37 (1.19, 1.58) | 1.81 (1.58, 2.07) | 2.05 (1.80, 2.34) | 3.02 (2.67, 3.42) | <0.001 | 2.73 (2.50, 2.98) |
| Multivariate model <sup>a</sup>   | 1.00       | 1.01 (0.88, 1.16) | 1.11 (0.96, 1.27) | 1.11 (0.97, 1.27) | 1.33 (1.16, 1.51) | <0.001 | 1.37 (1.22, 1.54) |
| <b>Pooled results<sup>b</sup></b> |            |                   |                   |                   |                   |        |                   |
| Unprocessed red meat              | 1.00       | 1.02 (0.96, 1.07) | 1.07 (1.01, 1.14) | 1.13 (1.07, 1.20) | 1.15 (1.08, 1.23) | <0.001 | 1.20 (1.12, 1.29) |
| Processed red meat                | 1.00       | 1.02 (0.85, 1.22) | 1.17 (1.10, 1.25) | 1.21 (1.04, 1.41) | 1.29 (1.12, 1.49) | <0.001 | 1.65 (1.49, 1.83) |
| Total red meat                    | 1.00       | 1.03 (0.97, 1.09) | 1.16 (1.09, 1.23) | 1.18 (1.12, 1.26) | 1.29 (1.21, 1.37) | <0.001 | 1.26 (1.20, 1.33) |

<sup>a</sup>Multivariate model: adjusted for age (continuous), BMI category (<23, 23-24.9, 25-29.9, 30-34.9, ≥35 kg/m<sup>2</sup>), alcohol consumption (0, 0.1-4.9, 5.0-14.9, ≥15 g/d), physical activity level (<3, 3-8.9, 9-17.9, 18.26.9, ≥27 MET-hrs/wk), smoking status (never, past, current 1-14 cigarettes/d, current 15-24 cigarettes/d, current ≥24 cigarettes/d), race (white/non-white), menopausal status and hormone use in women (premenopausal, postmenopausal never users, postmenopausal past users, postmenopausal current users), family history of diabetes, history of hypertension and hypercholesterolemia, quintiles of total calorie, and dietary score;

<sup>b</sup>Results from multivariate model were combined using fix effect model given than all the test for heterogeneity  $P > 0.15$ .

**Online Supplemental Table 3.** Hazard ratio (95% CI) of type 2 diabetes risk according to red meat intake in the HPFS, NHS I, and NHS II.

|                                 | Frequency of consumption |                   |                   |                   |                   | P for trend | HR for 1 serving/d |
|---------------------------------|--------------------------|-------------------|-------------------|-------------------|-------------------|-------------|--------------------|
|                                 | <1/wk                    | 1/wk              | 2-4/wk            | 5-6/wk            | ≥1/d              |             |                    |
| <b>Unprocessed red meat</b>     |                          |                   |                   |                   |                   |             |                    |
| <b>HPFS</b>                     |                          |                   |                   |                   |                   |             |                    |
| Cases/person-years              | 122/48444                | 459/147266        | 694/189831        | 337/86962         | 818/179801        |             |                    |
| Age-adjusted model              | 1.00                     | 1.22 (1.00, 1.49) | 1.42 (1.17, 1.72) | 1.54 (1.25, 1.90) | 1.91 (1.57, 2.30) | <0.001      | 1.38 (1.29, 1.48)  |
| Multivariate model <sup>a</sup> | 1.00                     | 1.03 (0.84, 1.26) | 1.07 (0.88, 1.21) | 1.11 (0.89, 1.38) | 1.26 (1.02, 1.56) | <0.001      | 1.16 (1.06, 1.26)  |
| <b>NHS I</b>                    |                          |                   |                   |                   |                   |             |                    |
| Cases/person-years              | 79/33878                 | 851/240276        | 2622/644637       | 1466/319173       | 3235/776209       |             |                    |
| Age-adjusted model              | 1.00                     | 1.47 (1.17, 1.85) | 1.74 (1.39, 2.17) | 1.96 (1.56, 2.46) | 2.27 (1.82, 2.84) | <0.001      | 1.29 (1.24, 1.34)  |
| Multivariate model <sup>a</sup> | 1.00                     | 1.10 (0.87, 1.39) | 1.18 (0.94, 1.48) | 1.22 (0.97, 1.54) | 1.31 (1.05, 1.65) | <0.001      | 1.09 (1.04, 1.14)  |
| <b>NHS II</b>                   |                          |                   |                   |                   |                   |             |                    |
| Cases/person-years              | 106/106217               | 506/321795        | 1029/487376       | 440/162034        | 987/288754        |             |                    |
| Age-adjusted model              | 1.00                     | 1.54 (1.24, 1.89) | 2.02 (1.65, 2.46) | 2.45 (1.98, 3.03) | 3.50 (2.87, 4.28) | <0.001      | 1.88 (1.77, 1.99)  |
| Multivariate model <sup>a</sup> | 1.00                     | 1.05 (0.85, 1.29) | 1.16 (0.94, 1.42) | 1.12 (0.90, 1.39) | 1.33 (1.07, 1.64) | <0.001      | 1.18 (1.09, 1.28)  |

| <b>Pooled results<sup>b</sup></b> |             |                   |                   |                   |                   |                   |                   |
|-----------------------------------|-------------|-------------------|-------------------|-------------------|-------------------|-------------------|-------------------|
| Multivariate model <sup>a</sup>   | 1.00        | 1.06 (0.93, 1.19) | 1.11 (1.01, 1.22) | 1.15 (1.01, 1.30) | 1.30 (1.15, 1.47) | <0.001            | 1.12 (1.08, 1.16) |
| <b>Processed red meat</b>         |             |                   |                   |                   |                   |                   |                   |
|                                   | <1/wk       | 1/wk              | 2-4/wk            | $\geq 5/wk$       |                   |                   |                   |
| <b>HPFS</b>                       |             |                   |                   |                   |                   |                   |                   |
| Cases/person-years                | 681/241861  | 953/247149        | 498/109159        | 298/54135         |                   |                   |                   |
| Age-adjusted model                | 1.00        | 1.39 (1.26, 1.53) | 1.66 (1.48, 1.87) | 2.10 (1.83, 2.41) | <0.001            | 1.55 (1.43, 1.68) |                   |
| Multivariate model <sup>a</sup>   | 1.00        | 1.17 (1.05, 1.29) | 1.33 (1.17, 1.50) | 1.64 (1.41, 1.91) | <0.001            | 1.34 (1.21, 1.48) |                   |
| <b>NHS I</b>                      |             |                   |                   |                   |                   |                   |                   |
| Cases/person-years                | 1689/518708 | 4442/1045500      | 1601/338619       | 521/111345        |                   |                   |                   |
| Age-adjusted model                | 1.00        | 1.43 (1.35, 1.51) | 1.74 (1.63, 1.87) | 2.10 (1.90, 2.32) | <0.001            | 1.85 (1.74, 1.97) |                   |
| Multivariate model <sup>a</sup>   | 1.00        | 1.16 (1.10, 1.23) | 1.23 (1.14, 1.32) | 1.34 (1.21, 1.49) | <0.001            | 1.30 (1.21, 1.41) |                   |
| <b>NHS II</b>                     |             |                   |                   |                   |                   |                   |                   |
| Cases/person-years                | 1085/664249 | 1348/533124       | 473/134105        | 162/34698         |                   |                   |                   |
| Age-adjusted model                | 1.00        | 1.55 (1.43, 1.68) | 2.33 (2.09, 2.59) | 3.58 (3.04, 4.23) | <0.001            | 2.53 (2.34, 2.73) |                   |
| Multivariate model <sup>a</sup>   | 1.00        | 1.09 (1.00, 1.19) | 1.22 (1.08, 1.36) | 1.44 (1.21, 1.71) | <0.001            | 1.37 (1.21, 1.55) |                   |
| <b>Pooled results<sup>b</sup></b> |             |                   |                   |                   |                   |                   |                   |
| Multivariate model <sup>a</sup>   | 1.00        | 1.14 (1.10, 1.20) | 1.25 (1.18, 1.31) | 1.43 (1.33, 1.55) | <0.001            | 1.32 (1.25, 1.40) |                   |

| <b>Total red meat</b>             |              |                   |                   |                   |                   |        |                   |
|-----------------------------------|--------------|-------------------|-------------------|-------------------|-------------------|--------|-------------------|
|                                   | <b>≤1/wk</b> | <b>2-4/wk</b>     | <b>5-6/wk</b>     | <b>1/d</b>        | <b>≥2/d</b>       |        |                   |
| <b>HPFS</b>                       |              |                   |                   |                   |                   |        |                   |
| Cases/person-years                | 320/121961   | 454/144046        | 305/81192         | 1000/235758       | 351/69347         |        |                   |
| Age-adjusted model                | 1.00         | 1.21 (1.05, 1.40) | 1.44 (1.23, 1.69) | 1.66 (1.47, 1.89) | 2.12 (1.82, 2.47) | <0.001 | 1.33 (1.27, 1.39) |
| Multivariate model <sup>a</sup>   | 1.00         | 1.05 (0.90, 1.21) | 1.17 (0.99, 1.38) | 1.28 (1.11, 1.48) | 1.51 (1.26, 1.81) | <0.001 | 1.19 (1.12, 1.27) |
| <b>NHS I</b>                      |              |                   |                   |                   |                   |        |                   |
| Cases/person-years                | 424/141283   | 1515/405095       | 1196/294675       | 4131/917399       | 987/255720        |        |                   |
| Age-adjusted model                | 1.00         | 1.28 (1.15, 1.42) | 1.42 (1.27, 1.58) | 1.77 (1.60, 1.96) | 2.12 (1.88, 2.38) | <0.001 | 1.32 (1.28, 1.36) |
| Multivariate model <sup>a</sup>   | 1.00         | 1.07 (0.95, 1.19) | 1.08 (0.97, 1.22) | 1.23 (1.10, 1.36) | 1.29 (1.14, 1.46) | <0.001 | 1.13 (1.08, 1.17) |
| <b>NHS II</b>                     |              |                   |                   |                   |                   |        |                   |
| Cases/person-years                | 227/191417   | 581/344902        | 442/218343        | 1441/520046       | 377/91468         |        |                   |
| Age-adjusted model                | 1.00         | 1.42 (1.22, 1.65) | 1.77 (1.50, 2.07) | 2.59 (2.25, 2.98) | 4.54 (3.85, 5.35) | <0.001 | 1.82 (1.74, 1.91) |
| Multivariate model <sup>a</sup>   | 1.00         | 1.00 (0.85, 1.16) | 1.06 (0.90, 1.25) | 1.18 (1.02, 1.37) | 1.39 (1.16, 1.67) | <0.001 | 1.18 (1.11, 1.26) |
| <b>Pooled results<sup>b</sup></b> |              |                   |                   |                   |                   |        |                   |
| Multivariate model <sup>a</sup>   | 1.00         | 1.05 (0.97, 1.13) | 1.10 (1.01, 1.19) | 1.23 (1.14, 1.32) | 1.36 (1.25, 1.49) | <0.001 | 1.14 (1.10, 1.18) |

<sup>a</sup>Multivariate model: adjusted for age (continuous), BMI category (<23, 23-24.9, 25-29.9, 30-34.9, ≥35 kg/m<sup>2</sup>), alcohol consumption (0, 0.1-4.9, 5.0-14.9, ≥15 g/d), physical activity level (<3, 3-8.9, 9-17.9, 18.26.9, ≥27 MET-hrs/wk), smoking status (never, past, current 1-14 cigarettes/d, current 15-24 cigarettes/d, current ≥24 cigarettes/d), race (white/non-white), menopausal status and hormone use in women (premenopausal, postmenopausal never users, postmenopausal past users, postmenopausal current users), family history of diabetes, history of hypertension and hypercholesterolemia, quintiles of total calorie, and dietary score;

<sup>b</sup>Results from multivariate model were combined using fix effect model given than all the test for heterogeneity  $P > 0.15$ .

**Online Supplemental Table 4.** List of papers included in previous two meta-analyses and the newly found 2 papers.

| Study                     | Included in the current meta-analysis | Reason for exclusion                                                                                                        |
|---------------------------|---------------------------------------|-----------------------------------------------------------------------------------------------------------------------------|
| van Dam et al. 2002 (10)  | No                                    | Previous publication in the Health Professionals Follow-up Study                                                            |
| Schulze et al. 2003 (11)  | No                                    | Previous publication in Nurses' Health Study II                                                                             |
| Fung et al. 2004 (12)     | No                                    | Previous publication in Nurses' Health Study I                                                                              |
| Simmons et al. 2007 (13)  | No                                    | $\geq 1$ portion/d vs. $< 1$ portion/d, crude analysis without adjustment for other covariates, data could not be extracted |
| Meyer et al. 2001. (14)   | No                                    | No continuous data available.                                                                                               |
| Lee et al. 2004 (15)      | No                                    | Same cohort as Meyer's paper. No continuous data available.                                                                 |
| Song et al. 2004 (16)     | Yes                                   |                                                                                                                             |
| Montonen et al. 2005 (17) | Yes                                   |                                                                                                                             |

|                                  |     |                                                                                                         |
|----------------------------------|-----|---------------------------------------------------------------------------------------------------------|
| Villegas et al. 2006 (18)        | Yes | Only in the unprocessed red meat analysis. Data could not be extracted for processed red meat analysis. |
| Hodge et al. 2007 (19)           | No  | Dietary pattern analysis.                                                                               |
| Schulze et al. 2007 (20)         | Yes | The authors provided unpublished data.<br>Kroger J et al., 2011, unpublished data.                      |
| Steinbrecher et al. 2010<br>(21) | Yes |                                                                                                         |
| Männistö et al. 2010<br>(22)     | Yes |                                                                                                         |

**Online Supplemental Table 5.** Characteristics of the prospective studies included in the current meta-analysis.

| References                | Cohort name                                              | Total No. of cases and participants | Follow-up years           | Age at baseline | Sex    | Diet assessment           | Diabetes assessment                                                        | Adjusted covariates                                                                                                                                                                                                                              |
|---------------------------|----------------------------------------------------------|-------------------------------------|---------------------------|-----------------|--------|---------------------------|----------------------------------------------------------------------------|--------------------------------------------------------------------------------------------------------------------------------------------------------------------------------------------------------------------------------------------------|
| Song et al. 2004 (16)     | Women's Health Study, USA                                | 1558 cases, 37309 participants      | 1993-2003, 8.8 years      | ≥45             | Female | Baseline validated FFQ    | Self-report + Appendix questionnaires                                      | Age, body mass index, smoking status, alcohol intake, physical activity, family history of diabetes, total energy intake, dietary intakes of fiber intake, glycemic load, magnesium, and total fat                                               |
| Montonen et al. 2005 (17) | Finnish Mobile Clinic Health Examination Survey, Finland | 383 cases, 4304 participants        | 1967/1972-1990, 23 years  | 40-69           | Both   | Dietary history interview | Drug reimbursement register                                                | Age, sex, body mass index, smoking status, family history of diabetes, geographic area and total energy intake                                                                                                                                   |
| Villegas et al. 2006 (18) | Shanghai Women's Health Study, China                     | 1972 cases, 70609 participants      | 1997-2004, 4.6 years      | 40-70           | Female | Updated validated FFQ     | Self-report, but results were also confirmed in cases who met ADA criteria | Age, body mass index, waist to hip ratio, smoking status, alcohol intake, physical activity, income level, education level, occupation status, history of hypertension and chronic disease at baseline, total energy intake and vegetable intake |
| Schulze et al. 2007 (20)  | EPIC-Potsdam Study, Germany                              | 849 cases, 25167 participants       | 1994/1998-2005, 7.0 years | 35-65           | Both   | Baseline validated FFQ    | Self-report, but validated according to ICD-10                             | Age, sex, body mass index, waist circumference, smoking status, education, occupational activity, sports activity, cycling, alcohol intake, total energy intake, magnesium, fiber, coffee, fruit and vegetable                                   |



|                               |                                                                  |                                  |                            |       |        |                        |                                                            |                                                                                                                                                                                                                                                                                                                         |
|-------------------------------|------------------------------------------------------------------|----------------------------------|----------------------------|-------|--------|------------------------|------------------------------------------------------------|-------------------------------------------------------------------------------------------------------------------------------------------------------------------------------------------------------------------------------------------------------------------------------------------------------------------------|
|                               |                                                                  |                                  |                            |       |        |                        |                                                            | intake                                                                                                                                                                                                                                                                                                                  |
| Steinbrecher et al. 2010 (21) | Multiethnic Cohort, USA                                          | 4555 cases, 36256 participants   | 1993/1996-2007, 13.5 years | 45-75 | Male   | Baseline validated FFQ | Self-report, medication questionnaire, health plan linkage | Age, ethnicity, body mass index, physical activity, education and total energy intake.                                                                                                                                                                                                                                  |
| Steinbrecher et al. 2010 (21) | Multiethnic Cohort, USA                                          | 4032 cases, 39256 participants   | 1993/1996-2007, 13.5 years | 45-75 | Female | Baseline validated FFQ | Self-report, medication questionnaire, health plan linkage | Age, ethnicity, body mass index, physical activity, education and total energy intake.                                                                                                                                                                                                                                  |
| Männistö et al. 2010 (22)     | Alpha-Tocopherol, Beta-Carotene Cancer Prevention study, Finland | 1098 cases, 24854 participants   | 1985/1988-1997, 12 years   | 50-69 | Male   | Baseline validated FFQ | Drug reimbursement register                                | Age, intervention groups, body mass index, number of cigarettes smoked daily, smoking years, alcohol intake, leisure-time physical activity, systolic blood pressure, diastolic blood pressure, serum total cholesterol and serum HDL cholesterol, total energy intake, fruits, vegetables, rye, milk and coffee intake |
| Pan et al. 2011               | Health Professionals Follow-up Study, USA                        | 2,460 cases, 37,272 participants | 1986-2006, 20 years        | 40-75 | Male   | Updated validated FFQ  | Self-report + Appendix questionnaires                      | Age, ethnicity, smoking status, alcohol intake, physical activity, history of hypertension and hypercholesterolemia, and a family history of                                                                                                                                                                            |

|                 |                              |                                  |                     |       |        |                       |                                       |                                                                                              |
|-----------------|------------------------------|----------------------------------|---------------------|-------|--------|-----------------------|---------------------------------------|----------------------------------------------------------------------------------------------|
|                 |                              |                                  |                     |       |        |                       |                                       | diabetes, total energy intake and diabetes dietary score                                     |
| Pan et al. 2011 | Nurses' Health Study I, USA  | 8,253 cases, 79,570 participants | 1980-2008, 28 years | 34-59 | Female | Updated validated FFQ | Self-report + Appendix questionnaires | Same as above plus postmenopausal status and menopausal hormone use                          |
| Pan et al. 2011 | Nurses' Health Study II, USA | 3,068 cases, 87,504 participants | 1991-2005, 14 years | 27-44 | Female | Updated validated FFQ | Self-report + Appendix questionnaires | Same as above plus postmenopausal status, menopausal hormone use, and oral contraceptive use |

**Online Supplemental Figure 1.** Publication bias test for unprocessed red meat and risk of type 2 diabetes.

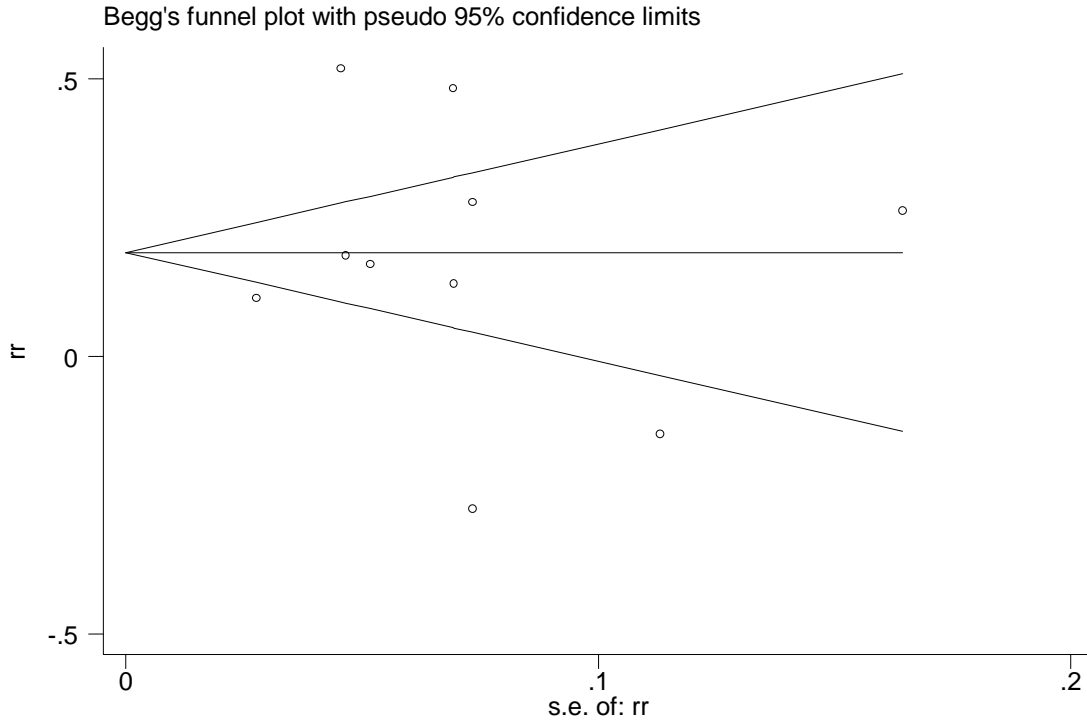

Tests for Publication Bias

Begg's Test,  $P = 0.66$ ; Egger's Test,  $P = 0.35$ .

**Online Supplemental Figure 2.** Publication bias test for processed red meat and risk of type 2 diabetes.

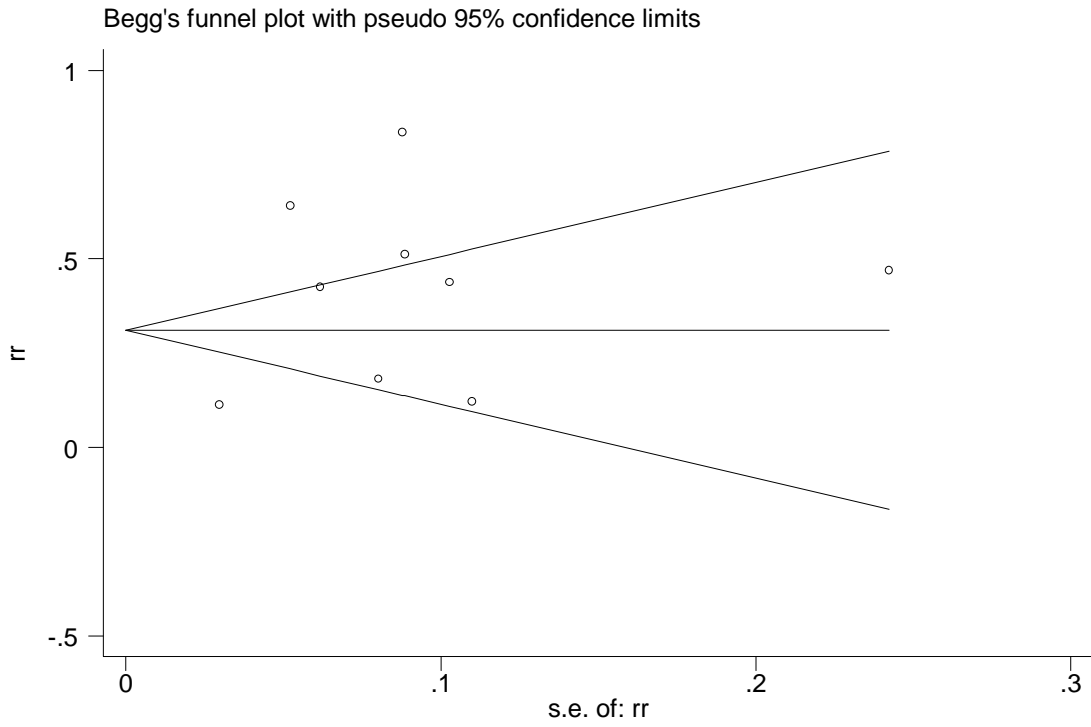

Tests for Publication Bias

Begg's Test,  $P = 0.35$ ; Egger's Test,  $P = 0.03$ .

**Online Supplemental Figure 3.** Publication bias test for the association between processed red meat intake and risk of type 2 diabetes after using trim and fill method.

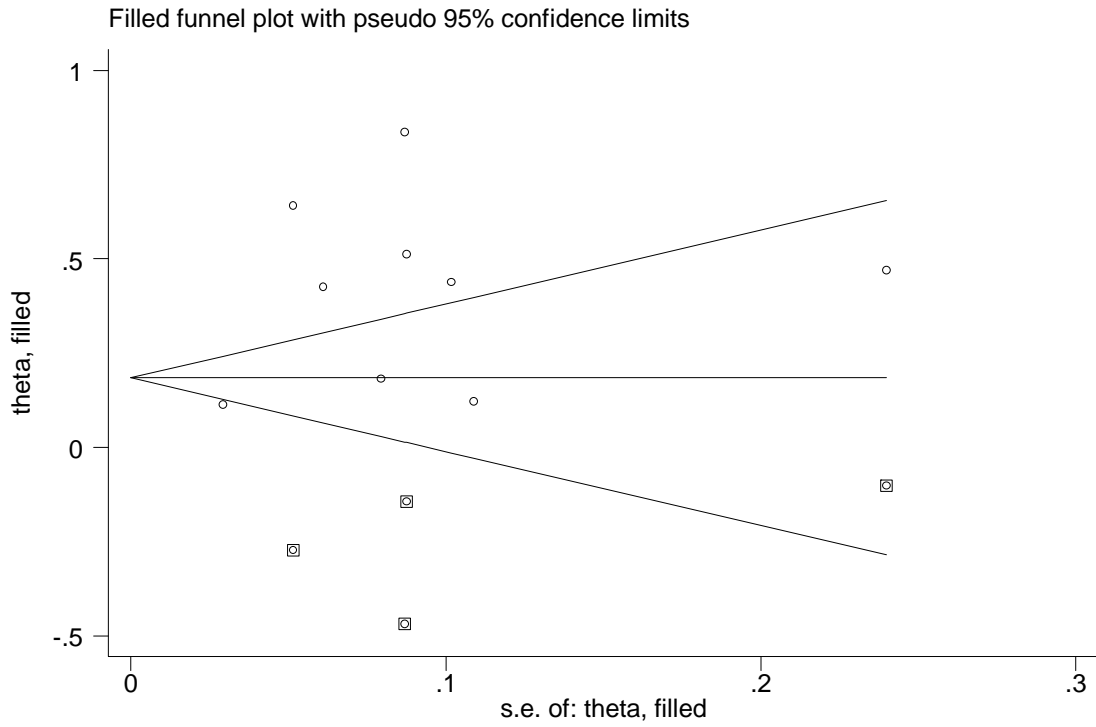

## References for the Online Supplemental Materials

1. Aune D, Ursin G, Veierod MB. Meat consumption and the risk of type 2 diabetes: a systematic review and meta-analysis of cohort studies. *Diabetologia* 2009;52:2277-87.
2. Micha R, Wallace SK, Mozaffarian D. Red and processed meat consumption and risk of incident coronary heart disease, stroke, and diabetes mellitus: a systematic review and meta-analysis. *Circulation* 2010;121:2271-83.
3. Orsini N, Bellocco R, Greenland S. Generalized least squares for trend estimation of summarized dose-response data. *Stata Journal* 2006;6:40–57.
4. DerSimonian R, and Laird N. Meta-analysis in clinical trials. *Control Clin Trials* 1986;7:177-88.
5. Higgins JP, Thompson SG. Quantifying heterogeneity in a meta-analysis. *Stat Med* 2002;21:1539-58.
6. Higgins JP, Thompson SG, Deeks JJ, and Altman DG. Measuring inconsistency in meta-analyses. *BMJ* 2003;327:557-60.
7. Begg CB, and Mazumdar M. Operating characteristics of a rank correlation test for publication bias. *Biometrics* 1994;50:1088-101.
8. Egger M, Davey Smith G, Schneider M, and Minder C. Bias in meta-analysis detected by a simple, graphical test. *BMJ* 1997;315:629-34.
9. Duval S, and Tweedie R. Trim and fill: A simple funnel-plot-based method of testing and adjusting for publication bias in meta-analysis. *Biometrics* 2000;56(2):455-63.

10. Meyer KA, Kushi LH, Jacobs DR Jr, Folsom AR. Dietary fat and incidence of type 2 diabetes in older Iowa women. *Diabetes Care* 2001;24:1528–35.
11. Lee DH, Folsom AR, Jacobs DR Jr. Dietary iron intake and Type 2 diabetes incidence in postmenopausal women: the Iowa Women's Health Study. *Diabetologia* 2004;47:185–94.
12. van Dam RM, Willett WC, Rimm EB, Stampfer MJ, Hu FB. Dietary fat and meat intake in relation to risk of type 2 diabetes in men. *Diabetes Care* 2002;25:417–24.
13. Schulze MB, Manson JE, Willett WC, Hu FB. Processed meat intake and incidence of type 2 diabetes in younger and middle-aged women. *Diabetologia*. 2003;46:1465–73.
14. Fung TT, Schulze M, Manson JE, Willett WC, Hu FB. Dietary patterns, meat intake, and the risk of type 2 diabetes in women. *Arch Intern Med*. 2004;164:2235–40.
15. Simmons RK, Harding AH, Wareham NJ, Griffin SJ. Do simple questions about diet and physical activity help to identify those at risk of type 2 diabetes? *Diabet Med* 2007;24:830–5.
16. Song Y, Manson JE, Buring JE, Liu S. A prospective study of red meat consumption and type 2 diabetes in middle-aged and elderly women: the women's health study. *Diabetes Care* 2004;27:2108–15.
17. Montonen J, Jarvinen R, Heliovaara M, Reunanen A, Aromaa A, Knekt P. Food consumption and the incidence of type II diabetes mellitus. *Eur J Clin Nutr* 2005;59:441–8.

18. Villegas R, Shu XO, Gao YT, et al. The association of meat intake and the risk of type 2 diabetes may be modified by body weight. *Int J Med Sci* 2006;3:152–9.
19. Hodge AM, English DR, O'Dea K, Giles GG. Dietary patterns and diabetes incidence in the Melbourne Collaborative Cohort Study. *Am J Epidemiol* 2007;165:603–10.
20. Schulze MB, Hoffmann K, Boeing H, et al. An accurate risk score based on anthropometric, dietary, and lifestyle factors to predict the development of type 2 diabetes. *Diabetes Care* 2007;30:510–5.
21. Steinbrecher A, Erber E, Grandinetti A, Kolonel L, Maskarinec G. Meat consumption and risk of type 2 diabetes: the Multiethnic Cohort. *Public Health Nutr* 2010;14:568-74.
22. Männistö S, Kontto J, Kataja-Tuomola M, Albanes D, Virtamo J. High processed meat consumption is a risk factor of type 2 diabetes in the Alpha-Tocopherol, Beta-Carotene Cancer Prevention study. *Br J Nutr* 2010;103:1817-22.
